# Supplementary material for: Cesarean delivery among women with prolonged labor induction
Source: publisher site journal article supplement (doi:10.1515/jpm-2014-0357), 2015-08-04
Supplement: Supplementary file 1 [file SuplDocument.docx]

**Supplemental Figure 1:** (A) Graphical correlation of total induction time with total oxytocin time demonstrated a significant collinear relationship (P<0.0001, r=0.59). (B) Graphical correlation of total induction time with maximal oxytocin dose demonstrated a significant collinear relationship (P<0.0001, r=0.33).
