# Supplementary figures and images for: Cesarean delivery among women with prolonged labor induction
Source: publisher site journal article supplement (doi:10.1515/jpm-2014-0357), 2015-08-04

# Supplemental Figure 1

A

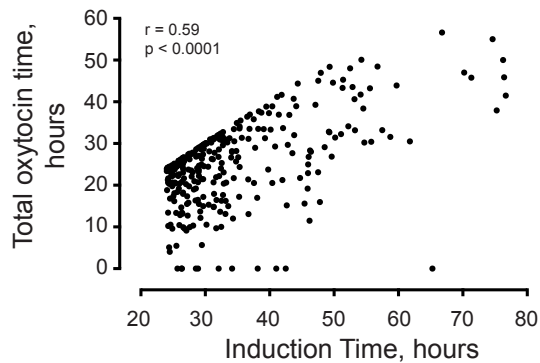

B

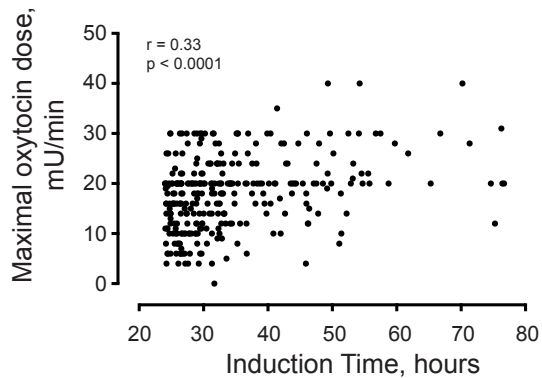

Supplement: Supplementary file 1 [file Suppl_Fig_1_correl_Revised.pdf › Suppl_Fig_1_correl_Revised.pdf]
